# Supplementary material
Source: Springer Nature journal article supplement (https://www.springermedizin.de/resource/supplementary/12906_2011_1365_MOESM4_ESM.pdf/9521734)

■ Usually Consulted Clinic   ■ Referred by Other Physician   ■ Recommended by Friend or Relative   ■ Other

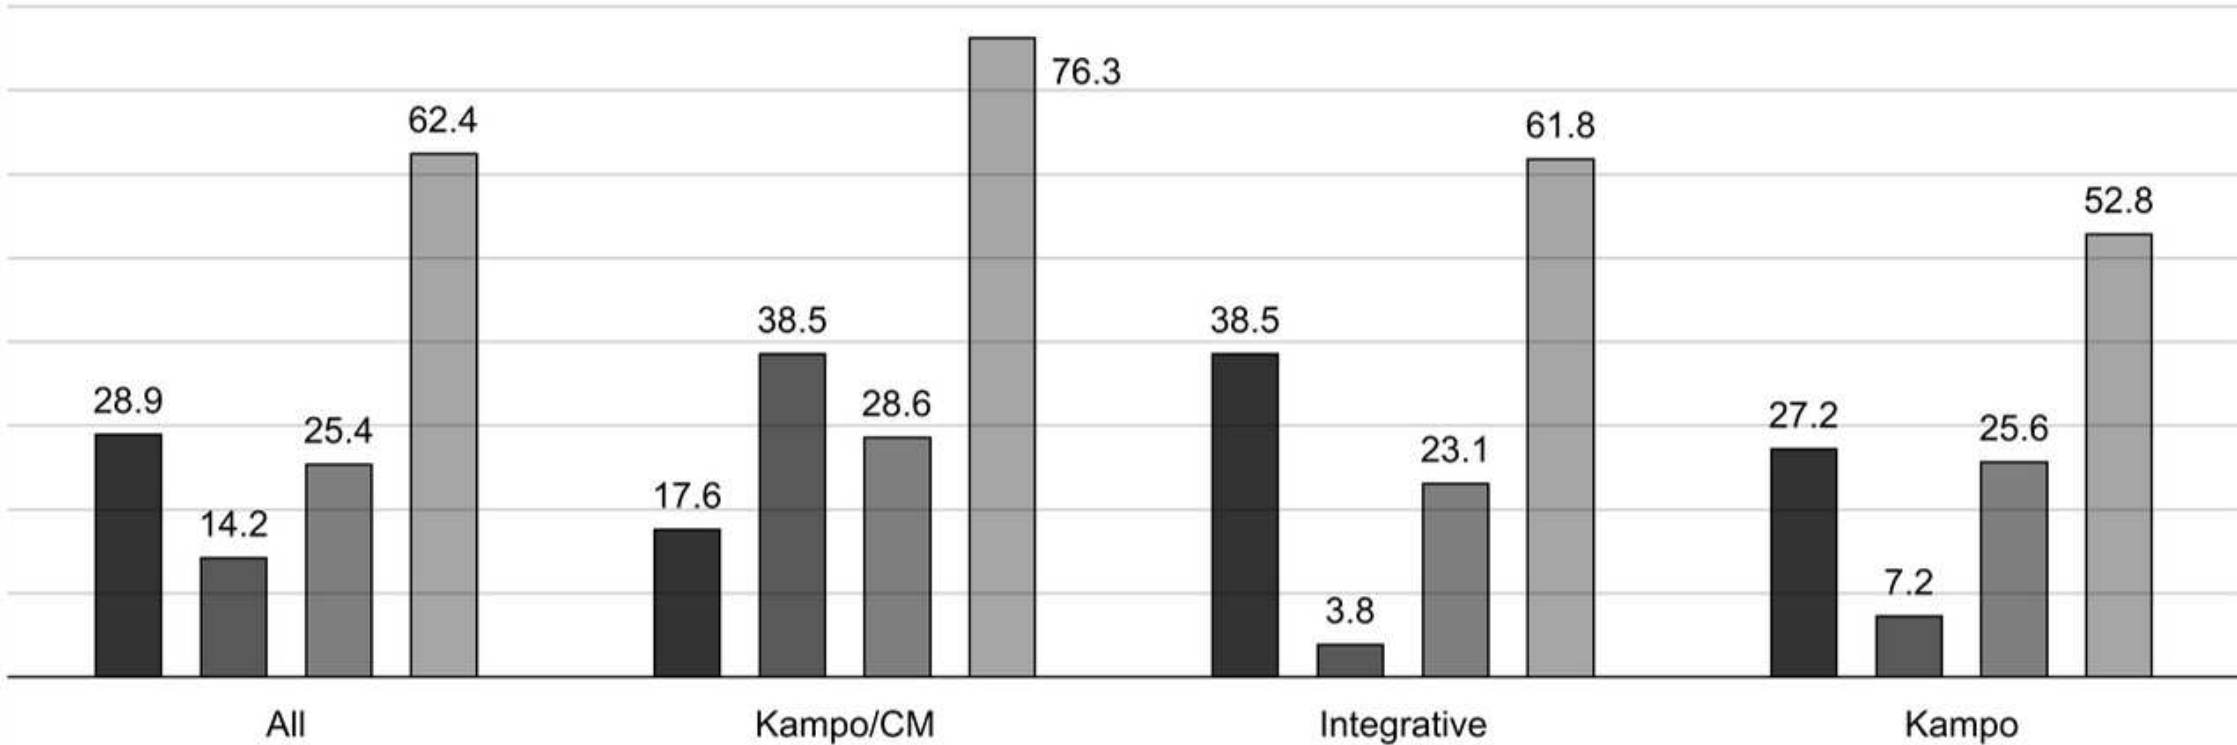

Supplement: MOESM4 [file 9521734]
